# Supplementary material for: HoCoRT: host contamination removal tool
Source: PubMed Central journal article supplement (PMC10544359; doi:10.1186/s12859-023-05492-w), 2023-10-02
Supplement: 12859_2023_5492_MOESM1_ESM.pdf [file 12859_2023_5492_MOESM1_ESM.pdf]

# HoCoRT: Host contamination removal tool

Ignas Rumbavicius, Trine B. Rounge, Torbjørn Rognes

## Supplementary material

### Supplementary figures

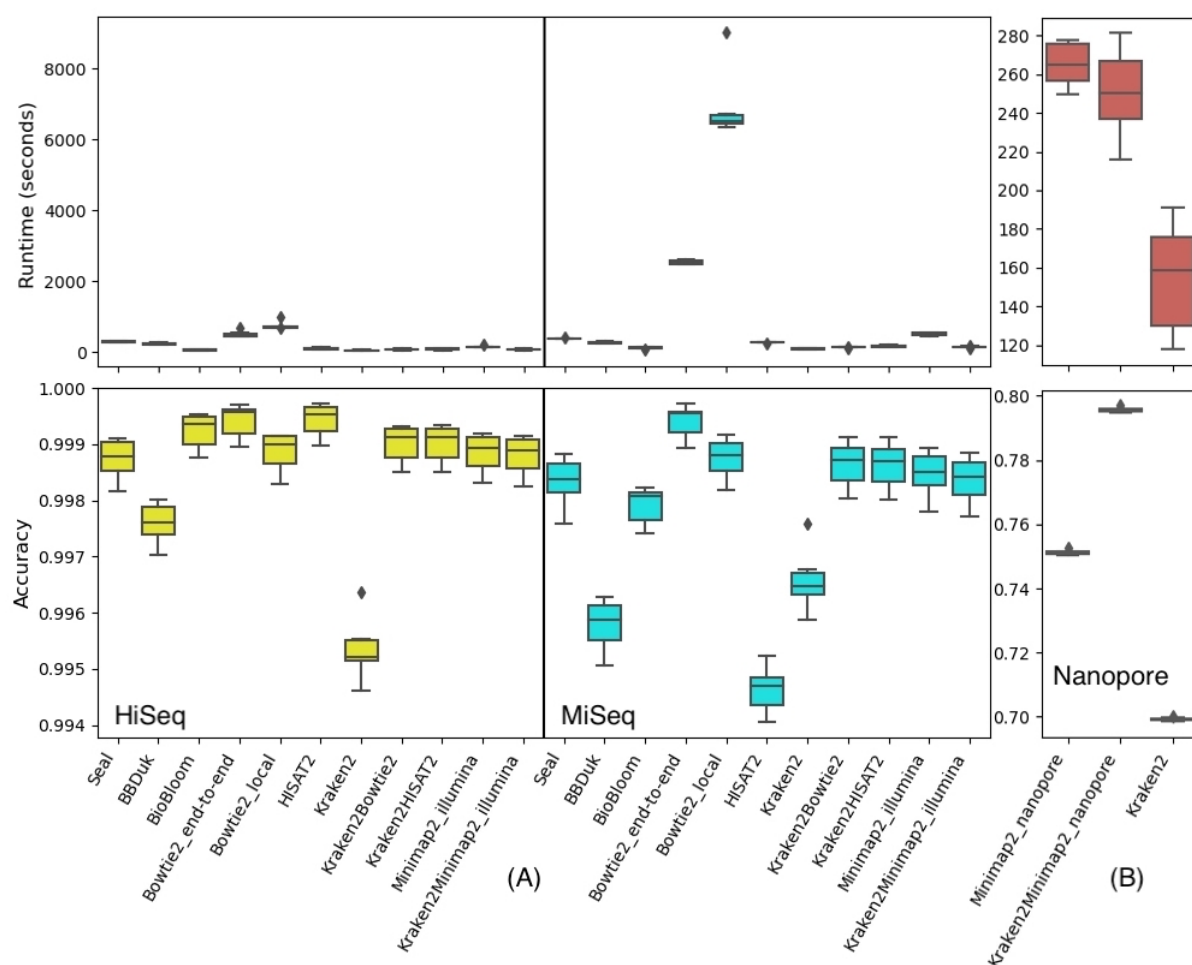

**Fig. S1. HoCoRT performance on simulated oral microbiome datasets.** Box plots of HoCoRT runtime in seconds (top) and classification accuracy (bottom) using several different classification modules and parameters on (A) HiSeq (yellow, left), MiSeq (cyan, right) and (B) Nanopore data (red). Table S2 contains additional results, including those for BioBloom (on Nanopore data), BBDuk, BBSplit, Bowtie2 with the “un-conc” option, and BWA-MEM2, which were excluded from this figure due to outliers.

## 18 Supplementary tables

19

20 **Table S1. Software.** The software packages used or mentioned are listed with version  
21 numbers and references.

22

| Software       | Version | References |
|----------------|---------|------------|
| ATLAS          |         | [2]        |
| BBDuk          | 39.01   | [4, 5]     |
| BBMap          | 39.01   | [4, 5]     |
| BBSplit        | 39.01   | [4, 5]     |
| BioBloom Tools | 2.3.5   | [11]       |
| BioConda       | 23.1.0  | [10]       |
| BLAST          | 2.13.0  | [23]       |
| Bowtie2        | 2.4.5   | [7]        |
| BWA-SW         |         | [6]        |
| BWA-MEM2       | 2.2.1   | [12]       |
| CLARK          |         | [21]       |
| CONSULT        |         | [20]       |
| DeconSeq       | 0.4.3   | [8]        |
| GenCoF         |         | [9]        |
| HISAT2         | 2.2.1   | [13]       |
| HoCoRT         | 1.2.2   | [24]       |
| InSiliconSeq   | 1.5.4   | [18]       |
| Kraken2        | 2.1.2   | [14]       |
| MiniMap2       | 2.24    | [15]       |
| NanoSim        | 3.0.0   | [19]       |
| Samtools       | 1.16.1  | [16]       |
| Seal           | 39.01   | [4, 5]     |
| SnakeMake      | 7.19.1  | [22]       |
| Sunbeam        |         | [3]        |

23

24

25 **Table S2. Detailed HoCoRT performance on simulated oral microbiome datasets.** The  
 26 average runtime (in seconds), accuracy, precision, and sensitivity of the classification are  
 27 shown for each pipeline and for each data type. The best (blue) and worst (red) performing  
 28 pipelines are indicated for each performance metric and data type.  
 29

| Pipeline                   | Runtime | Accuracy | Precision | Sensitivity |
|----------------------------|---------|----------|-----------|-------------|
| <b>Paired-end HiSeq</b>    |         |          |           |             |
| Seal                       | 289.5   | 0.9987   | 0.9975    | 1.0000      |
| BBDuk                      | 228.2   | 0.9976   | 0.9952    | 1.0000      |
| BBSplit                    | 1489.1  | 0.9991   | 0.9982    | 1.0000      |
| BioBloom                   | 60.0    | 0.9992   | 0.9990    | 0.9994      |
| Bowtie2_end-to-end         | 495.4   | 0.9994   | 0.9988    | 1.0000      |
| Bowtie2_local              | 739.4   | 0.9989   | 0.9977    | 1.0000      |
| Bowtie2_end-to-end_un_conc | 571.3   | 0.6809   | 0.9993    | 0.3621      |
| Bowtie2_local_un_conc      | 814.7   | 0.7300   | 0.9988    | 0.4606      |
| HISAT2                     | 104.4   | 0.9994   | 0.9990    | 0.9998      |
| Kraken2                    | 47.5    | 0.9954   | 0.9980    | 0.9927      |
| BBMap_default              | 9351.0  | 0.9991   | 0.9982    | 1.0000      |
| BBMap_fast                 | 1062.5  | 0.9992   | 0.9985    | 0.9999      |
| BWA_MEM2                   | 461.9   | 0.9858   | 0.9725    | 1.0000      |
| Kraken2Bowtie2             | 68.1    | 0.9990   | 0.9980    | 1.0000      |
| Kraken2HISAT2              | 79.9    | 0.9990   | 0.9980    | 1.0000      |
| Minimap2_illumina          | 149.1   | 0.9988   | 0.9977    | 1.0000      |
| Kraken2Minimap2_illumina   | 70.9    | 0.9988   | 0.9976    | 1.0000      |
| <b>Paired-end MiSeq</b>    |         |          |           |             |
| Seal                       | 374.8   | 0.9983   | 0.9967    | 1.0000      |
| BBDuk                      | 273.0   | 0.9958   | 0.9916    | 1.0000      |
| BBSplit                    | 4046.9  | 0.9993   | 0.9985    | 1.0000      |
| BioBloom                   | 116.9   | 0.9979   | 0.9990    | 0.9968      |
| Bowtie2_end-to-end         | 2540.8  | 0.9994   | 0.9989    | 0.9999      |
| Bowtie2_local              | 6887.7  | 0.9988   | 0.9975    | 1.0000      |
| Bowtie2_end-to-end_un_conc | 2534.2  | 0.5230   | 0.9997    | 0.0460      |
| Bowtie2_local_un_conc      | 7015.4  | 0.6122   | 0.9986    | 0.2247      |
| HISAT2                     | 267.9   | 0.9946   | 0.9991    | 0.9901      |
| Kraken2                    | 89.4    | 0.9966   | 0.9973    | 0.9959      |
| BBMap_default              | 84978.6 | 0.9989   | 0.9985    | 0.9992      |
| BBMap_fast                 | 3435.6  | 0.9973   | 0.9989    | 0.9957      |
| BWA_MEM2                   | 2142.9  | 0.9718   | 0.9471    | 1.0000      |
| Kraken2Bowtie2             | 142.3   | 0.9986   | 0.9973    | 1.0000      |
| Kraken2HISAT2              | 163.6   | 0.9986   | 0.9973    | 0.9999      |
| Minimap2_illumina          | 518.5   | 0.9985   | 0.9970    | 1.0000      |
| Kraken2Minimap2_illumina   | 149.1   | 0.9984   | 0.9967    | 1.0000      |
| <b>Single-end Nanopore</b> |         |          |           |             |
| BioBloom                   | 152.1   | 0.5007   | 1.0000    | 0.0013      |
| Minimap2_nanopore          | 265.3   | 0.7512   | 1.0000    | 0.5025      |
| KrakenMinimap2_nanopore    | 250.7   | 0.7957   | 0.9996    | 0.5916      |
| Kraken2                    | 153.9   | 0.6993   | 0.9995    | 0.3988      |

31 **Table S3. Comparison of the performance of DeconSeq and HoCoRT using Bowtie2 in**  
 32 **end-to-end mode on single-ended HiSeq and MiSeq reads.** The average runtime (in  
 33 seconds), accuracy, precision, and sensitivity are shown for each tool. The best (blue) and  
 34 worst (red) performing tool is indicated for each performance metric.  
 35

| Tool and pipeline       | Runtime | Accuracy | Precision | Sensitivity |
|-------------------------|---------|----------|-----------|-------------|
| <b>Single-end HiSeq</b> |         |          |           |             |
| Bowtie2_end-to-end      | 49.8    | 0.99947  | 0.94934   | 0.99992     |
| DeconSeq                | 1677.2  | 0.99869  | 0.88432   | 0.99994     |
| <b>Single-end MiSeq</b> |         |          |           |             |
| Bowtie2_end-to-end      | 88.7    | 0.99960  | 0.96194   | 0.99974     |
| DeconSeq                | 4384.2  | 0.99824  | 0.85028   | 1.00000     |

36  
 37  
 38  
 39  
 40  
 41  
 42  
 43  
 44  
 45  
 46

**Table S4. Evaluation on real microbiome datasets.** The number of potentially  
 contaminating human reads identified in two real microbiome datasets sequenced using  
 Illumina HiSeq (SRR18498477) and Nanopore (SRR9847864) technology are shown. The  
 HoCoRT pipelines using Bowtie2 and Minimap2 were employed, as well as BLAST. The  
 fraction of predicted human reads are indicated in parentheses as percentages of all the  
 original reads.

| Accession                                                | SRR18498477        | SRR9847864        |
|----------------------------------------------------------|--------------------|-------------------|
| <b>Sequencing</b>                                        | Illumina HiSeq     | Nanopore          |
| <b>Original reads</b>                                    | 46 273 568         | 9 741 166         |
| <b>HoCoRT Bowtie2</b><br>(of original)                   | 9 704<br>(0.021%)  | -                 |
| <b>HoCoRT Minimap2</b><br>(of original)                  | 12 252<br>(0.026%) | 3 288<br>(0.033%) |
| <b>BLAST</b> ( $E < 1 \cdot 10^{-10}$ )<br>(of original) | 10 970<br>(0.024%) | 154<br>(0.0016%)  |

47
